1  
2 **Scale-eating specialists evolved adaptive feeding kinematics within a**  
3 **microendemic radiation of San Salvador Island pupfishes**

4  
5 Michelle E. St. John<sup>1,2</sup>, Christopher H. Martin<sup>1,2\*</sup>

6  
7 <sup>1</sup>Department of Biology, University of North Carolina at Chapel Hill, NC, USA

8  
9 <sup>2</sup>Department of Integrative Biology and Museum of Vertebrate Zoology, University of  
10 California, Berkeley, CA 94720, USA

11  
12 \*Corresponding Author: [chmartin@berkeley.edu](mailto:chmartin@berkeley.edu)

13  
14  
15  
16  
17  
18  
19  
20  
21  
22  
23  
24  
25  
26 Short title: Scale-eating specialists evolved adaptive feeding kinematics.

27 keywords: feeding kinematics, novelty, key innovation, lepidophagy, performance, postzygotic  
28 isolation, hybrid kinematics

29 Abstract: 269 words, Main text plus references/figures: 7,357, 5 Tables, 6 Figures, Supplemental

30 Tables S1-S3, Figures S1-S3, and Supplemental video S1

31 **Abstract**

32 Adaptation to novel ecological niches often includes shifts in behaviors, such as new foraging  
33 preferences or changes in kinematics. Investigating prey capture kinematics is an excellent way  
34 to understand behavioral mechanisms underlying the origins of novel trophic specialization, in  
35 which organisms begin to exploit novel resources. We investigated the contribution of  
36 kinematics to the origins of a novel ecological niche for scale-eating within a microendemic  
37 adaptive radiation of pupfishes on San Salvador Island, Bahamas. We compared the feeding  
38 kinematics of scale-eating, generalist, snail-eating, and F1 hybrid pupfishes while they consumed  
39 scales and shrimp in the lab and compared them to scale-eating kinematics observed in situ in the  
40 wild. We then connected variation in feeding kinematics to scale-biting performance by  
41 measuring the area removed per strike from standardized gelatin cubes. We found that scale-  
42 eating pupfish exhibited divergent feeding kinematics compared to all other groups and that  
43 these differences were consistent across food items. The peak gapes of scale-eaters were twice as  
44 large as all other groups, but their gape angles were simultaneously 32% smaller, in both  
45 laboratory and in situ wild observations. We also show that this kinematic combination of large  
46 peak gape and small gape angle resides on a performance optimum for scale-biting. Finally, F1  
47 hybrid kinematics and performance were not additive, and were instead closer to the generalist  
48 pupfish. This suggests that impaired hybrid performance in the scale-eating niche may contribute  
49 to extrinsic postzygotic reproductive isolation between species. Ultimately, our results suggest  
50 that shifts in kinematics (i.e. peak gape and gape angle) are an adaptation to the novel niche of  
51 scale-eating and contribute to reproductive isolation between species.

52

## 53 **Introduction**

54 Determining how organisms use resources for the first time and occupy novel niches is an  
55 outstanding question in evolutionary ecology. Many changes accompany adaptation to a novel  
56 niche, and previous studies have identified that shifts in behaviors (Bowman and Billeb 1965;  
57 Tebbich et al. 2010; Curry and Anderson 2012), morphologies (Ferry-Graham et al. 2001; Ferry-  
58 Graham 2002; Hata et al. 2011; Davis et al. 2018), physiologies (Arias-Rodriguez et al. 2011;  
59 Tobler et al. 2015, 2018), and kinematics (Janovetz 2005; Patek et al. 2006; Cullen et al. 2013;  
60 McGee et al. 2013) can all facilitate this transition.

61 Shifts in kinematic traits—particularly those which affect prey capture and feeding—are  
62 especially promising, because they can provide biomechanical insights into the origins of novel  
63 trophic niches. For example, some species of trap-jaw ants have evolved specialized latch,  
64 spring, and trigger structures in their jaws which allow for rapid, power-amplified bites used to  
65 capture prey items unavailable to other ant species (Patek et al. 2006; Larabee and Suarez 2014);  
66 power-amplified jaws in Syngnathiform fishes have evolved two different latch mechanisms for  
67 specialization on evasive prey items (Longo et al. 2018); and the Pacific leaping blenny (*Alticus*  
68 *arnoldorum*) uniquely uses axial tail twisting to improve propulsion and stability for greater  
69 jumping performance and terrestrial prey capture (Hsieh 2010).

70 Differences in prey capture kinematics between species may also contribute to  
71 postzygotic extrinsic reproductive isolation by reducing hybrid foraging performance (Higham et  
72 al. 2016b), which may lead to speciation (Henning et al. 2017; Matthews and Albertson 2017).  
73 For example, McGee et al. (2015) measured prey capture kinematics and performance in two  
74 sunfish species (Centrarchidae) and their naturally occurring hybrids. Hybrid sunfish had an  
75 intermediate gape compared to parental types and initiated strikes from an intermediate distance.

76 However, the force exerted on prey items and the maximum escape force needed to evade  
77 attacks, estimated from the suction-induced flow field model (Holzman et al. 2012), was less  
78 than the intermediate performance expected. Hybrid Lake Victoria cichlids (produced by  
79 crossing *Haplochromis chilotes* (thick-lipped) and *Pundamilia nyererei* (thin-lipped) species)  
80 also exhibited lower foraging performance compared to parental species, most likely due to  
81 antagonistic pleiotropy and genetic correlations between head and lip morphology (Henning et  
82 al. 2017). Despite these findings, few studies investigate how hybrid kinematics affects the  
83 evolution of novelty or explicitly connect kinematics to performance consequences.

84 Investigating the kinematics of scale-eating is an excellent system for connecting a  
85 mechanistic understanding of feeding kinematics with adaptation to a novel trophic niche. Scale-  
86 eating (lepidophagy) is a novel behavioral trophic niche that is extremely rare which has  
87 independently evolved only 19 times in approximately 100 fish species out of over 35,000  
88 (Sazima 1983; Martin and Wainwright 2013a; Kolmann et al. 2018). However, not much is  
89 known about its evolutionary origins or its kinematics. Current hypotheses for the origins of  
90 scale-eating vary, but they all take a strict behavior-first approach (Greenwood 1965; Sazima  
91 1983; St. John et al. 2018). It is therefore plausible that kinematic variation may have also  
92 contributed to the origins of scale-eating.

93 Currently, only a few studies have investigated the feeding kinematics and performance  
94 of scale-eating fishes. Janovetz (2005) measured feeding kinematics of the wimple piranha  
95 (*Catoprion mento*) while consuming: 1) free floating scales, 2) whole fish, and 3) scales off the  
96 sides of fish, and found that scale-eating kinematics were divergent from those used in either  
97 suction-feeding or biting. Interestingly, scale-eating attacks produced gape angles that ranged  
98 from 30-100% larger than those produced from consuming free-floating scales or whole fish

99 respectively— suggesting that a larger gape is necessary for scale-eating. Furthermore, this  
100 variation in gape angle across food items was documented within individuals indicating that  
101 scale-eating kinematics may be plastic (Janovetz 2005). The feeding kinematics of the  
102 Lake Tanganyikan scale-eating cichlid, *Perissodus microlepis*, have also been examined  
103 (Takeuchi et al. 2012; Takeuchi and Oda 2017); however, these studies primarily focused on  
104 how kinematics interacted with *P. microlepis*' antisymmetric mouth morphology and not on  
105 scale-eating kinematics *per se*. Nonetheless, these studies found a significant interaction between  
106 kinematic traits, behavior, and morphology as these fish were able to perform more successful  
107 scale-eating strikes using their dominant side (Takeuchi et al. 2012; Takeuchi and Oda 2017). A  
108 similar oral jaw antisymmetry and behavioral laterality was documented in a scale-eating  
109 characiform (*Exodon paradoxus*; Hata et al. 2011). While these studies provide valuable insights  
110 into scale-eating kinematics and performance, the lack of kinematic measurements in closely  
111 related non-scale-eating species or hybrids has so far limited further investigations of the origins  
112 of scale-eating.

113         There are four additional comparisons and measurements that would help shed light on  
114 the relationship between kinematic traits and occupation of a novel niche when investigating  
115 scale-eating. First, comparisons of scale-eating kinematics across scale-eating and closely related  
116 non-scale-eating outgroup species is necessary for investigating the origins of novelty. Without  
117 the comparative method it is impossible to determine which kinematic variables are unique or  
118 important for scale-eating. Second, very few kinematic studies investigate hybrid kinematics.  
119 Understanding hybrid kinematics, especially in the context of novelty, is informative because 1)  
120 impaired performance in hybrids is a form of extrinsic postzygotic isolation between species  
121 (McGee et al. 2015; Higham et al. 2016b) and 2) it can allow the decoupling of morphology,

122 behavior, and kinematics making it easier to identify causative traits underlying performance  
123 (Holzman and Hulseley 2017). Third, very few studies investigate kinematics in the wild (but see:  
124 Keren et al. 2018; Whitford et al. 2019). While this is undoubtedly due to the difficulty of  
125 collecting these data in the field, it does introduce a level of uncertainty regarding whether  
126 kinematics observed in the lab are relevant to performance demands in nature (Shapiro et al.  
127 2011; Stevens et al. 2011). Finally, few studies connect observed variation in kinematics to  
128 variation in whole organism feeding performance (but see: Svanbäck et al. 2003; Takeuchi et al.  
129 2012; Whitford et al. 2019). Making this connection is important because it can identify  
130 kinematic traits associated with performance tasks relevant to evolutionary fitness rather than  
131 simply describing phenotypic variation in kinematic traits, most of which may not be relevant to  
132 performance or fitness (Hu et al. 2017).

133         The scale-eating pupfish (*Cyprinodon desquamator*) is an excellent organism to  
134 investigate the interaction of kinematics and novelty for several reasons. First, the scale-eating  
135 pupfish evolved within a recent sympatric radiation of pupfishes on San Salvador Island,  
136 Bahamas. This radiation is endemic to a few hypersaline lakes on the island (Martin and  
137 Wainwright 2013a), which were most likely dry during the last glacial maximum 10-15 kya  
138 (Hagey and Mylroie 1995). Second, the radiation provides closely related sister taxa for  
139 kinematic comparison. The radiation contains three species: 1) the scale-eating pupfish, 2) a  
140 generalist pupfish (*C. variegatus*), and 3) a snail-eating pupfish (*C. brontotheroides*).  
141 Phylogenetic evidence suggests that scale-eating pupfishes form a clade across all lakes where  
142 they are found on San Salvador and that this clade is sister to a clade containing generalists and  
143 snail-eaters (Martin and Feinstein 2014; Lencer et al. 2017). Generalists and snail-eaters,  
144 however, cluster together within lakes suggesting either extensive gene flow between species or

145 multiple origins of snail-eating (Martin and Feinstein 2014; Martin 2016; Richards and Martin  
146 2017). Third, all three pupfish species can be crossed in the lab to measure the kinematics and  
147 performance of hybrid phenotypes.

148 We investigated the interaction between kinematics and novelty in San Salvador  
149 generalist, snail-eating, and scale-eating pupfishes, and their F1 hybrids while performing high-  
150 speed strikes on three different food items (scales, frozen mysis shrimp, and gelatin cubes). We  
151 asked: 1) if scale-eating pupfish varied in their feeding kinematics compared to other groups, 2)  
152 if scale-eating strikes differed from strikes on frozen mysis shrimp, 3) if scale-eating strikes in  
153 the lab differed from scale-eating strikes in the wild, 4) whether variation in kinematics was  
154 associated with bite performance, and 5) if F1 hybrid feeding kinematics differed from parental  
155 species. Ultimately, we found that feeding kinematics of scale-eating pupfish resulted in bite  
156 sizes 50% larger than all other species, suggesting that scale-eater kinematics are a recent  
157 adaptation for scale-eating.

158

## 159 **Methods**

### 160 *Collection and Husbandry*

161 We used seine nets to collect generalist, snail-eating, and scale-eating pupfishes from Crescent  
162 Pond, Little Lake, and Osprey Lake on San Salvador Island, Bahamas in July, 2017 and March,  
163 2018. Wild-caught fish were maintained in 37-75L mixed-sex stock tanks at a salinity of 5-10  
164 ppt and temperature of 23-27°C. While in stock tanks, fish were fed a diet of bloodworms, mysis  
165 shrimp, and commercial pellet foods daily. In the lab, we crossed generalist and scale-eating  
166 pupfishes from both Little Lake and Crescent Pond to produce F1 hybrid offspring. Prior to  
167 filming, pupfish were isolated in a 2L tank to maintain individual IDs throughout the study.

168

169 ***Laboratory feeding kinematics***

170 We recorded pupfishes feeding on three different food items: frozen mysis shrimp, scales, and  
171 standardized gelatin cubes (dimensions: 1.5 cm x5cm X 1.5 cm x 1.5 cm cube; Repashy  
172 Superfoods, Community Plus Omnivore Gel Premix; prepared following manufacturer's  
173 instructions). In the lab, fish freely consumed mysis shrimp (Hikari, Inc.), but we had to train all  
174 species to feed on scales from the sides of euthanized zebrafish (*Danio rerio*; stored frozen) and  
175 to feed from gelatin cubes (stored at 4°C). For training, we isolated each fish in a 2 liter plastic  
176 tank and presented a given food item (either euthanized zebrafish or gelatin cube) daily. If a  
177 pupfish began feeding on the item, it was left in the tank until the pupfish stopped feeding. If a  
178 pupfish did not begin feeding within one minute, the food item was removed from the tank. Any  
179 pupfish that did not feed received a supplemental feeding of commercial pellet food (New Life  
180 Spectrum Thera-A, medium sinking pellets). If an individual did not feed on a training item for  
181 more than two days, we reduced supplemental feedings to once every two days to ensure that the  
182 fish was sufficiently motivated. Once pupfish reliably began feeding on either scales or gelatin  
183 cubes, we proceeded to film their feeding behaviors according to the filming protocol below.  
184 Fish were never trained on more than one item at a time, and we instead ensured that all filming  
185 was completed for a single food item before proceeding to train for the next item.

186 For all three food items, we followed the same filming protocol and used the same  
187 equipment: 1) a Sony Cyber-shot DSC-RX10 III (480fps) or Sony Cyber-shot DSC-RX100 IV  
188 20.1 MP (480fps) for high-speed video of foraging strikes and 2) a dimmable bi-color 480  
189 LED light (Neewer) as an additional light source. Prior to filming, each pupfish—still in their 2  
190 L tank—was placed in front of 0.5 cm grid paper. We placed our camera as close as possible to



191 the tank while still keeping both the pupfish and food item in frame. We placed the additional  
192 LED light source approximately 0.3 m from the filming tank and allowed pupfish to acclimate to  
193 the lighting until they moved around their tank freely after approximately 5 minutes. Once a  
194 pupfish was acclimated we presented the pupfish with a given food item. For scale-eating we  
195 used forceps to hold a euthanized zebrafish horizontally in the water column and perpendicular  
196 to the front of an individual. For mysis shrimp and gelatin cubes, we dropped the food item a few  
197 inches in front of an individual. All videos were taken from a lateral perspective. Once filming  
198 for one food item was completed, the process was repeated until we filmed each individual  
199 consuming all three food items.

200

### 201 *Scale-eating kinematics in the wild*

202 We also filmed seven usable lateral scale-eating strikes by scale-eaters in the wild. It was not  
203 possible to film generalist or snail-eater scale-eating strikes, since these species do not naturally  
204 strike scales at a detectable frequency in nature (although scales have been found in the guts of  
205 both species at very low frequencies; Martin and Wainwright 2013). We used a Chronos camera  
206 (Kron Technologies, model 1.4, 16 GB memory, Color image sensor) with an f1.4 zoom lens in a  
207 custom underwater housing (Salty Surf, Inc. Krontech Chronos 1.4 housing with M80 flat port)  
208 to record natural high-speed videos of scale-eating in Crescent Pond, San Salvador Island (see  
209 Supplemental Video S1). We recorded videos while snorkeling along the shoreline in 0.3 – 0.5 m  
210 depth in March, 2018. We set the frame rate to the minimum of 1080 fps on the camera,  
211 however, our manual calibration of stopwatch videos filmed in the field indicated that the  
212 effective frame rate was only 270 fps.

213 Standardized reference objects for calibration (i.e. grid paper) were not present in the  
214 wild scale-eating videos and filming a reference object in a second video was a substantial  
215 obstacle given the constantly shifting distance between the camera and subject and the necessity  
216 of removing the camera from the underwater housing to store and reset after each video. Instead,  
217 we measured the diameter of 20 mermaid's cup macroalgae (*Acetabularia acetabulum*) from a  
218 photograph containing a ruler and estimated the mean cup diameter of adult cups (mean  $\pm$  SE:  
219  $3.31 \pm 2.86$  mm). This macroalgae was present in all videos. We used this mean cup diameter to  
220 convert wild measurements in pixels to meters.

221

## 222 *Kinematic analyses*

223 We analyzed videos by converting them to image stacks using Adobe Media Encoder (Version  
224 13.0.2). Image sequences were then imported into image processing software (FIJI) for analysis  
225 (Schindelin et al. 2012). To quantify feeding performance, we measured 8 kinematic trait  
226 metrics: peak jaw protrusion, time to peak jaw protrusion, peak gape, time to peak gape, gape  
227 angle at time of peak gape, starting distance from food item, time to impact, and ram speed  
228 (Table 1).

229 All time and distance metrics were measured from the start of a strike defined as when  
230 the lower jaw was opened to ~20% of peak gape, identified by visual inspection of each frame  
231 (following: Oufiero et al. 2012; Staab et al. 2012). In addition to our kinematic metrics, we also  
232 measured body length and lower jaw length (Table S1) using images from the video. We  
233 calibrated each video using the background grid for laboratory strikes and macroalgae for wild  
234 strikes. Kinematic profiles of a single representative scale-eating strike from each species are  
235 shown in Figure 1.



237 **Figure 1.**  
238

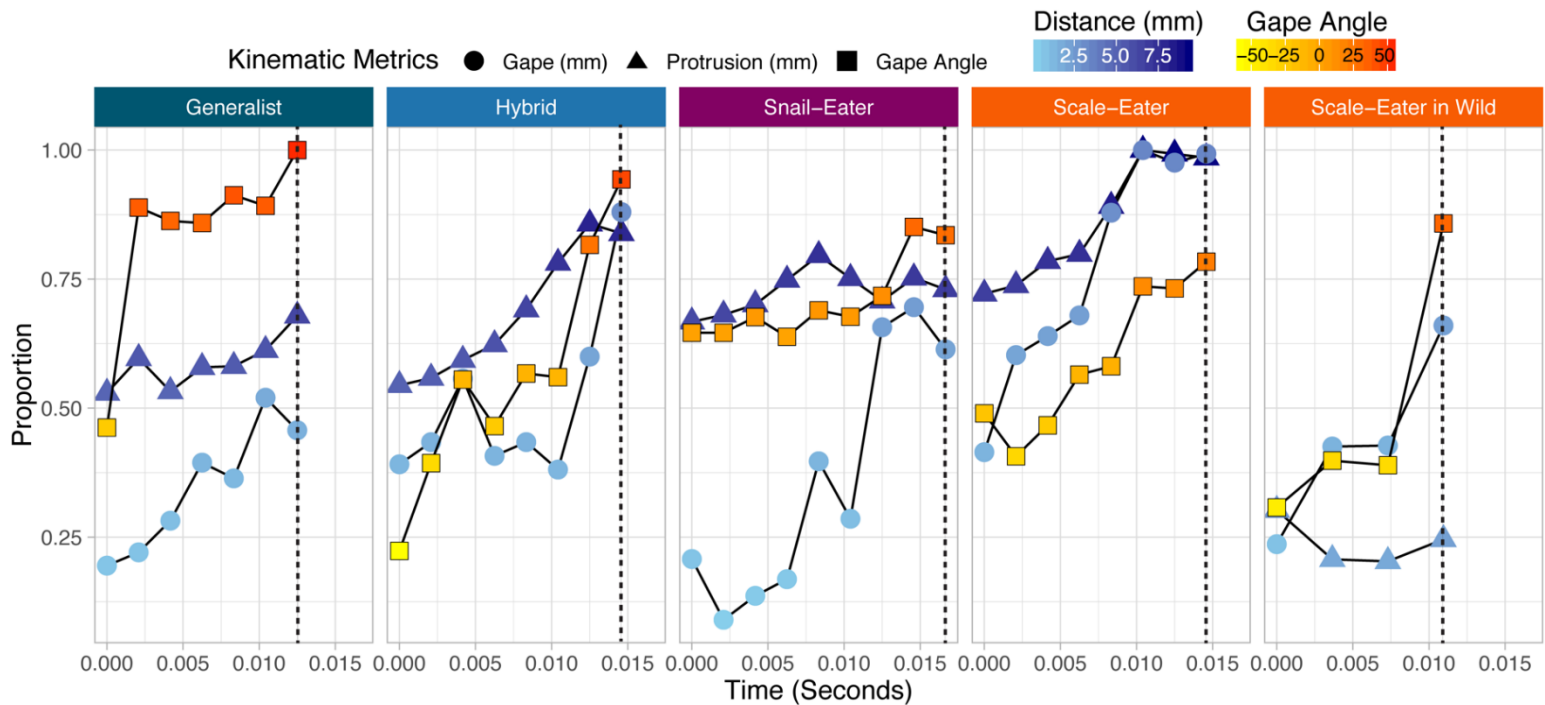

239 **Figure 1. Kinematic profiles of pupfish species for scale-eating strikes observed**  
240 **in the lab and in situ in the wild.** We produced kinematic profiles for a single  
241 representative strike for each group, and reported the proportional change in gape  
242 distance, jaw protrusion distance, and gape angle over the course of a single scale-  
243 eating strike. Time zero for each group represents the start of an attack (i.e. 20% of  
244 peak gape) and the dotted line indicates the time of impact with the prey. Point positions  
245 are relative to the highest value metric across groups (e.g. a value of 1 indicates the  
246 largest value of a given metric). Fill colors show raw values for each point.

247

#### 248 *Measuring bite performance*

249 In order to connect variation in feeding kinematics to variation in bite size we recorded high-

250 speed strikes on gelatin meal replacement for fish in the shape of a 1.5 x 1.5 x 1.5 cm cube. We

251 filmed a feeding strike on a single cube and immediately removed the cube from the tank. The

252 gel cube retains its shape in water and therefore allowed us to precisely photograph and measure

253 the area removed by each bite. We used an Olympus Tough TG-5 camera to take photos of each

254 lateral surface of the cube —ensuring that we had photographed the entire bite—and measured the

255 total area removed from the cube (Figure 4).

256

## 257 *Statistical analyses*

### 258 *Comparing strike kinematics*

259 We collected and analyzed 101 feeding strikes from 31 individuals striking both shrimp and  
260 scales. (7 generalists; 7 snail-eaters; 9 scale-eaters; 8 F1 hybrids). We used linear mixed models  
261 in the lme4 package in R (Bates et al. 2014) and RStudio (R Core Team 2018) to determine if  
262 any of our kinematic metrics varied between species or food item. In each model we included: 1)  
263 the kinematic metric as the response variable, 2) species designation, food item, and their  
264 interaction as fixed effects, 3) individual fish IDs and population as random effects, and 3) log  
265 body size as a covariate (Table 3). Similarly, we used linear mixed models to determine if the  
266 feeding strikes of scale-eaters in the wild differed from those in the lab. We used each kinematic  
267 metric as the response variable, and modeled: 1) environment (e.g. lab or wild) as a fixed effect,  
268 2) individual ID nested within environment as a random effect, and 3) log body length as a  
269 covariate (Table 4).

270 We also performed a linear discriminant analysis (LDA) on the combined shrimp and  
271 scales kinematic data to reduce dimensionality and identify which kinematic metrics contributed  
272 most to differences between species (Table 2, Figure 2A). We used a MANOVA and Wilks'  $\lambda$  to  
273 assess the significance of the LDA. Our MANOVA included 1) all 8 kinematic metrics as  
274 response variables, 2) species designation as a predictor variable, and 3) individual ID as a  
275 random effect.

276 Although we compared kinematic data across multiple species, very few genetic variants  
277 are fixed between species (<1,000 SNPs out of 12 million) and generalists and molluscivores  
278 cluster by lake rather than by species (McGirr and Martin 2017; Richards and Martin 2017).

279 Thus, is it appropriate to analyze species differences at these recent timescales as population-  
280 scale data using mixed model analyses of independent populations (e.g. Hatfield and Schluter  
281 1999; McGee et al. 2013), rather than phylogenetic comparative methods.

282

### 283 *Determining how kinematic variables affect bite performance*

284 We used a linear mixed model to investigate if the area removed from a cube ( $\text{mm}^2$ ) was  
285 associated with any of the kinematic variables measured during strikes by all three species and  
286 F1 hybrids. We first performed principle components analysis (PCA) of our 8 kinematic  
287 variables (Table S3) to obtain a set of orthogonal axes and subsequently used all eight PCs as  
288 fixed effects in our mixed model. We included 1) area removed from a cube ( $\text{mm}^2$ ) as the  
289 response variable, 2) PC1-8 as fixed effects, 3) fish ID and species as random effects, and 4) log  
290 body length as a covariate (Table 5).

291 We also used generalized additive models (GAMs) using the *mgcv* package (Wood 2011)  
292 in R to further investigate how peak gape, peak protrusion, and gape angle affected bite size. We  
293 specifically chose these kinematic variables because our previous linear mixed model indicated  
294 that PC5 was a significant predictor variable of bite size which included major loadings of peak  
295 gape and peak protrusion (Table 5). Our first GAM included 1) area removed from a cube ( $\text{mm}^2$ )  
296 as the response variable and 2) a spline modeling the interaction between peak gape and peak  
297 protrusion as predictor. Since peak gape and peak protrusion are on the same relative scale (mm)  
298 we used an isotropic thin-plate smoothing spline for this model. In our second model, we  
299 included 1) area removed from a cube ( $\text{mm}^2$ ) as the response variable and 2) peak gape, gape  
300 angle, and peak protrusion as predictor variables, and used univariate smoothing splines for each  
301 kinematic variable within the GAM.

302 Finally, we predicted the area removed per bite for each fish from their peak gape and  
303 gape angle kinematic measurements using a machine-learning algorithm from the caret package  
304 using a spline-based method (Kuhn 2008). Thus, for all scale-eating and shrimp-feeding strikes  
305 resulting in unknown bite sizes (unlike the gelatin cube strikes), we were able to build and tune a  
306 GAM model connecting our two kinematic variables of interest to the area removed from gelatin  
307 cubes (observed bite performance) in order to predict bite performance for all strikes in our  
308 dataset.

309 We built the model using 1) area removed from a cube ( $\text{mm}^2$ ) as the response variable  
310 and 2) peak gape and gape angle as predictor variables. We trained the model using all strikes  
311 observed on gelatin cubes (31 strikes across all three species and F1 hybrids) and 10-fold cross-  
312 validations with three repeats as the resampling scheme. We tested the accuracy of this model by  
313 comparing fitted values from the model to observed values from the data set and found that our  
314 model was able to predict 68% of the variance in the dataset ( $df=1$ ,  $F=63.84$ ,  $P=8.2 \times 10^{-9}$ ,  
315  $R^2=0.68$ ). We then used this model to predict the bite area removed for each scale-eating and  
316 shrimp-eating strike based on the kinematic measurements alone. We used bootstrap resampling  
317 (20,000 iterations) to calculate mean bite size (predicted area removed) and 95% confidence  
318 intervals for each species.

319

### 320 *Determining if hybrid kinematics match additive predictions*

321 For peak gape, gape angle, and bite size, we calculated the predicted values of F1 scale-eater by  
322 generalist hybrids under the hypothesis that these kinematic traits would be additive and  
323 therefore intermediate between generalist and scale-eater values. We used a one sample  $t$ -test to

324 test whether the observed values of peak gape, gape angle, and the predicted bite sizes for F1  
325 hybrids deviated from additive predictions.

326

## 327 **Results**

### 328 *Scale-eaters exhibited divergent feeding kinematics compared to other pupfishes*

329 Scale-eaters exhibited divergent feeding kinematics, while consuming both shrimp and scales,  
330 compared to other groups (Figure 2A). A MANOVA supported the significance of this  
331 discriminant analysis and found species designation was a significant predictor of kinematics  
332 (Wilks'  $\lambda = 0.10$ ;  $F = 2.9471$ ;  $df = 3$ ;  $P = 0.000394$ ). Species significantly varied in their peak  
333 gape and gape angles during feeding strikes—regardless of the food item—in a linear mixed  
334 model controlling for individual ID and body length (Table 3). This pattern was driven by scale-  
335 eaters who had peak gapes that were twice as large as other species, but also had gape angles that  
336 were one third smaller than other species (Figure 2B-C).

337

### 338 *Pupfish ram speed was 48% faster when consuming shrimp*

339 Ram speed was the only kinematic variable that varied between food items, increasing by ~50%  
340 for shrimp strikes (0.098 m/s, CI: 0.082, 0.12) relative to scale-eating strikes (0.066 m/s, CI:  
341 0.061, 0.070; Table 3; Figure S2).

342

343

344

345

346



347 **Figure 2.**

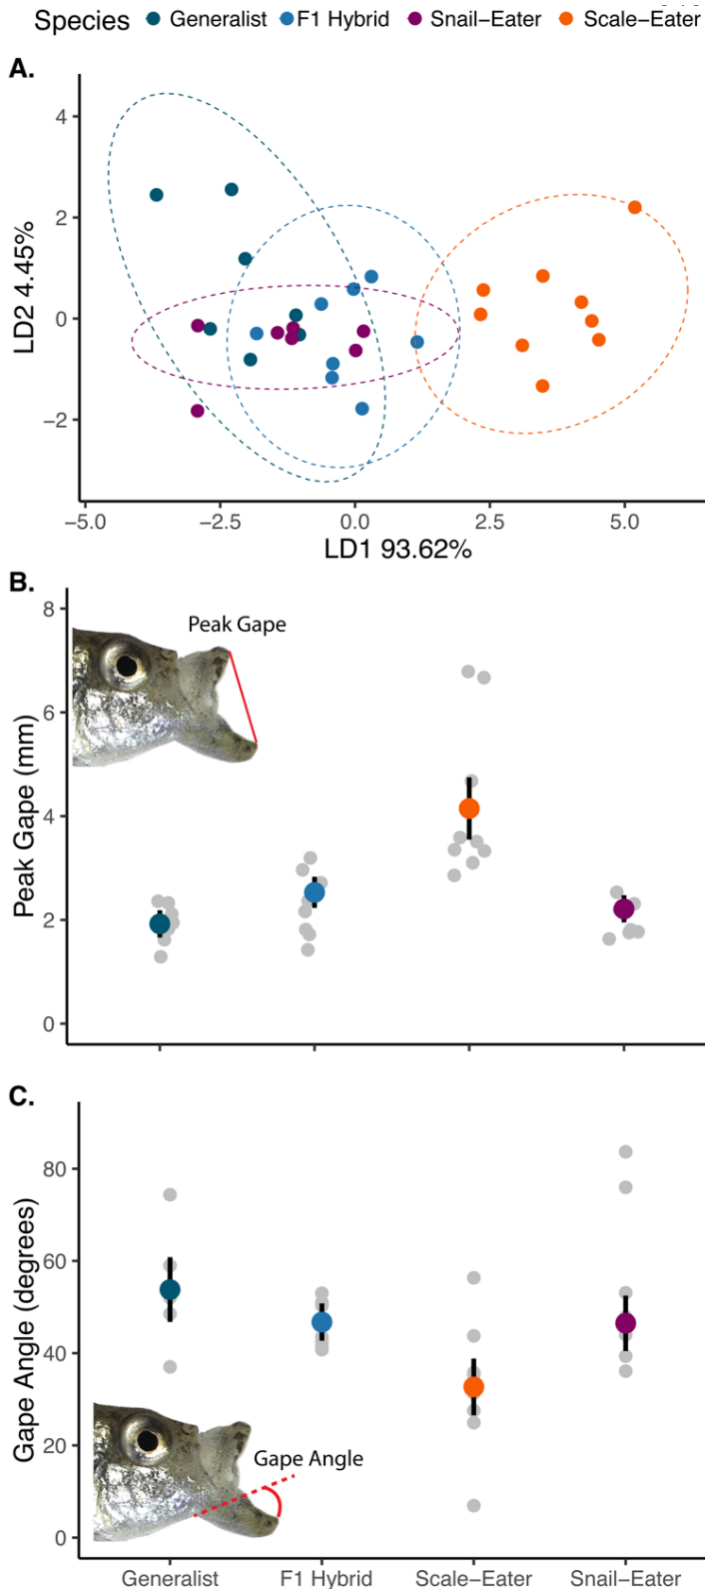

**Figure 2. Divergent feeding kinematics in scale-eaters.** A) Biplot of discriminant axes 1 (LD1) and 2 (LD2) describing overall kinematic differences among pupfish species (generalists, snail-eaters, scale-eaters, or F1 hybrids). Ellipses represent 95% CIs. B) Mean peak gape (mm) for each species with  $\pm$  95% CIs calculated via bootstrapping (20,000 iterations). C) Mean gape angle at peak gape (mm) for each species with  $\pm$  95% CIs calculated via bootstrapping (20,000 iterations).

381 *Scale-eating in the wild differed from scale-eating in the lab*  
382 Scale-eating attacks in the wild started from over twice as far away as those observed in the lab  
383 ( $P = 0.033$ ; Table 4; Figure 3A) and ram speed was almost three times faster in the wild than in  
384 the lab ( $P = 0.00099$ ; Table 4; Figure 1, 3B). However, the range of strike kinematics for both  
385 these variables overlapped between the lab and field, indicating substantial variation in scale-  
386 eating kinematics in both environments.

387

388 **Figure 3.**

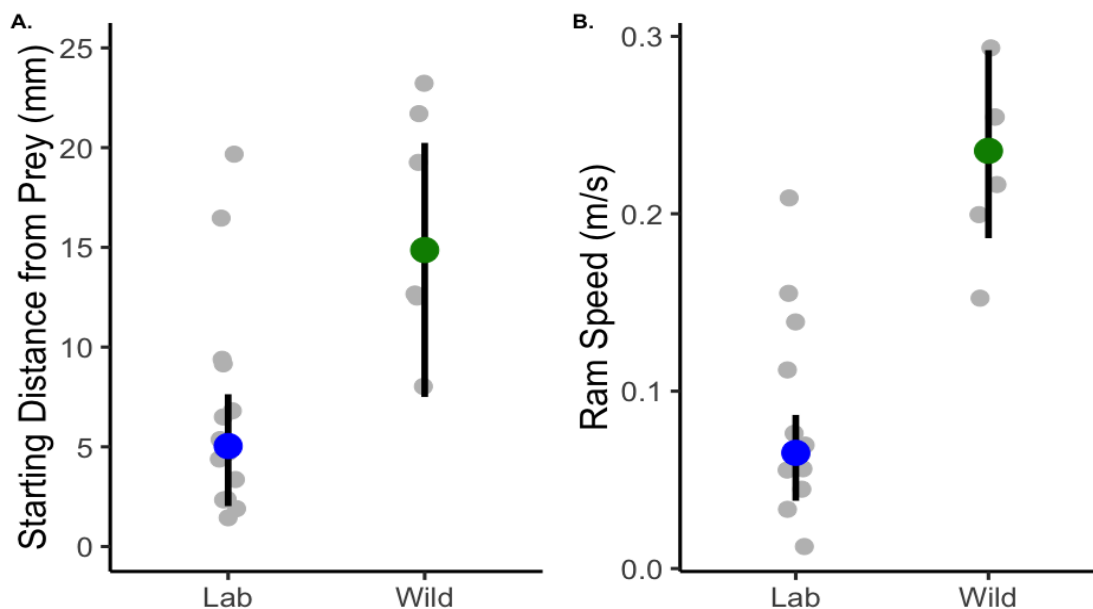

398 **Figure 3. Wild scale-eating strikes are more than twice as fast and start three**  
399 **times farther away than lab strikes.** a) Mean starting distance from prey defined as  
400 20% of peak gape and b) mean ram speed ( $\pm 95\%$  CIs; bootstrapping 20,000 iterations)  
401 for scale-eaters consuming scales in the lab and observed in situ in Crescent Pond, San  
402 Salvador Island, Bahamas.

403

404

405

406

407 *Variation in feeding kinematics affected bite size performance*

408 Two out of eight principal component axes of strike kinematics were significantly associated  
409 with the surface area removed from a gelatin cube per strike (Table 5). However, the significance  
410 of PC2 was entirely driven by a single outlier, and when removed, this axis was no longer  
411 significantly associated with bite size ( $\chi^2=0.71$ ,  $df=1$ ,  $P=0.40$ ; Figure S3). PC5 remained  
412 significantly associated with bite size regardless of whether this outlier was included in the  
413 dataset. PC5 contained two major loadings ( $|loadings|>.4$ ): peak gape and peak protrusion (Table  
414 S3), which loaded in opposite directions (Table 5, Figure 4).

415

416 **Figure 4.**

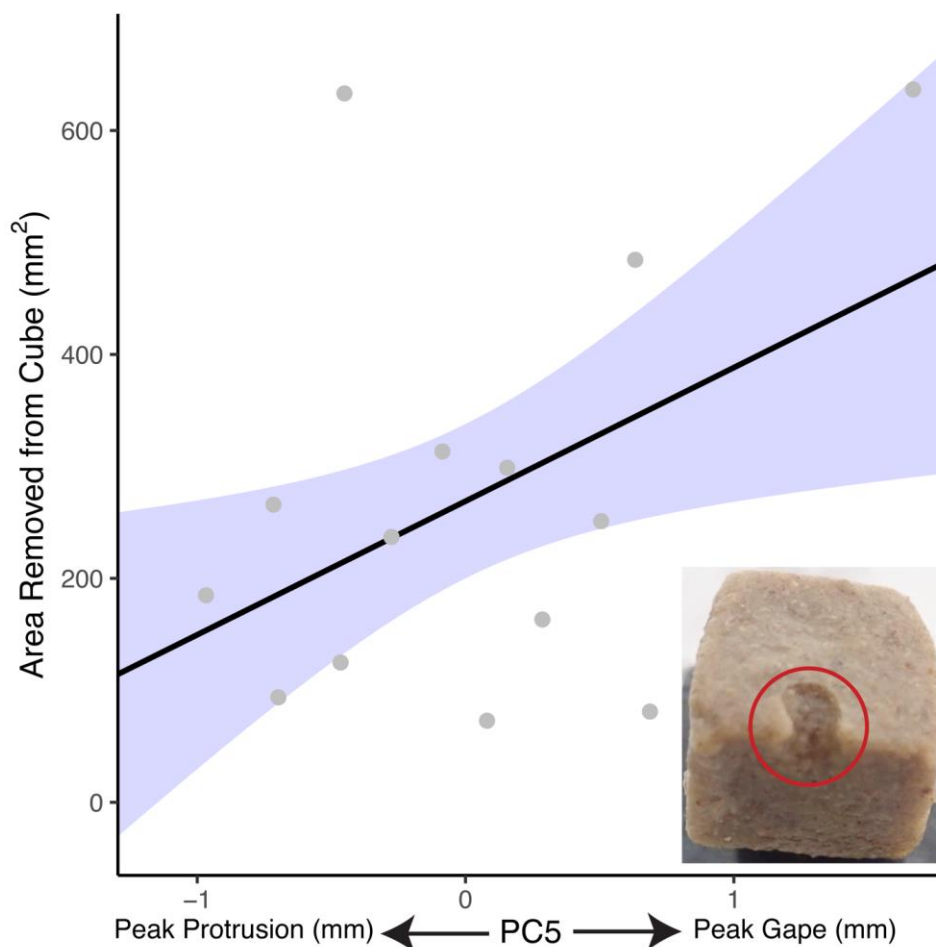

417

418 **Figure 4. Peak gape and peak protrusion affect bite size.** Graph illustrating the  
419 positive relationship between PC5 and the area removed from a gelatin cube (mm<sup>2</sup>)  
420 from a single strike. The major loadings of PC5 are peak gape and peak protrusion.  
421 Grey dots represent individual fish, the line represents the fitted prediction of a linear  
422 model along with a 95% CI ribbon in blue.

423

424 Our GAMs also indicated that the interaction between peak gape and peak protrusion, modeled  
425 as a thin-plate spline, was significantly associated with bite size ( $edf=6.61$ ,  $Ref.df=29$ ,  $F= 0.59$ ,  
426  $P= 0.027$ ), and explained 47.6% of the observed deviance in bite size (Figure 5A). Our second  
427 GAM, which modeled peak gape, gape angle, and peak protrusion as independent univariate  
428 smoothing splines, explained 69% of the deviance in bite size and indicated that increased peak  
429 gape ( $edf=4.96$ ,  $F= 7.88$ ,  $P= 6.22 \times 10^{-5}$ ) and reduced gape angle were significantly associated  
430 with increased bite size ( $edf=1$ ,  $F= 4.72$ ,  $P= 0.04$ ). We also fit a model including gape angle and  
431 peak protrusion as linear fixed effects instead of splines; however, this model provided a poorer  
432 fit to the data ( $\Delta AIC = 2.13$ ). Taken together, our results suggest that a larger gape and smaller  
433 gape angle are associated with larger areas removed per bite, but that jaw protrusion distance has  
434 only a small effect (increases explained deviance by 0.9%; change in  $\Delta AIC = 1.39$ ) on bite size  
435 (Figure 5B-D).

436 Our machine learning model also predicted that scale-eater kinematics would result in  
437 bite sizes that are 65% larger than the predicted bites of the other species (Figure 6).

438 Interestingly, estimates for F1 hybrid bite sizes were smaller than expected if kinematic metrics  
439 and bite performance are additive traits; however, this effect was only marginal (T-test,  $\mu=$

440 340.73, mean= 289.18,  $P = 0.059$ ).

441

442

443 **Figure 5.**

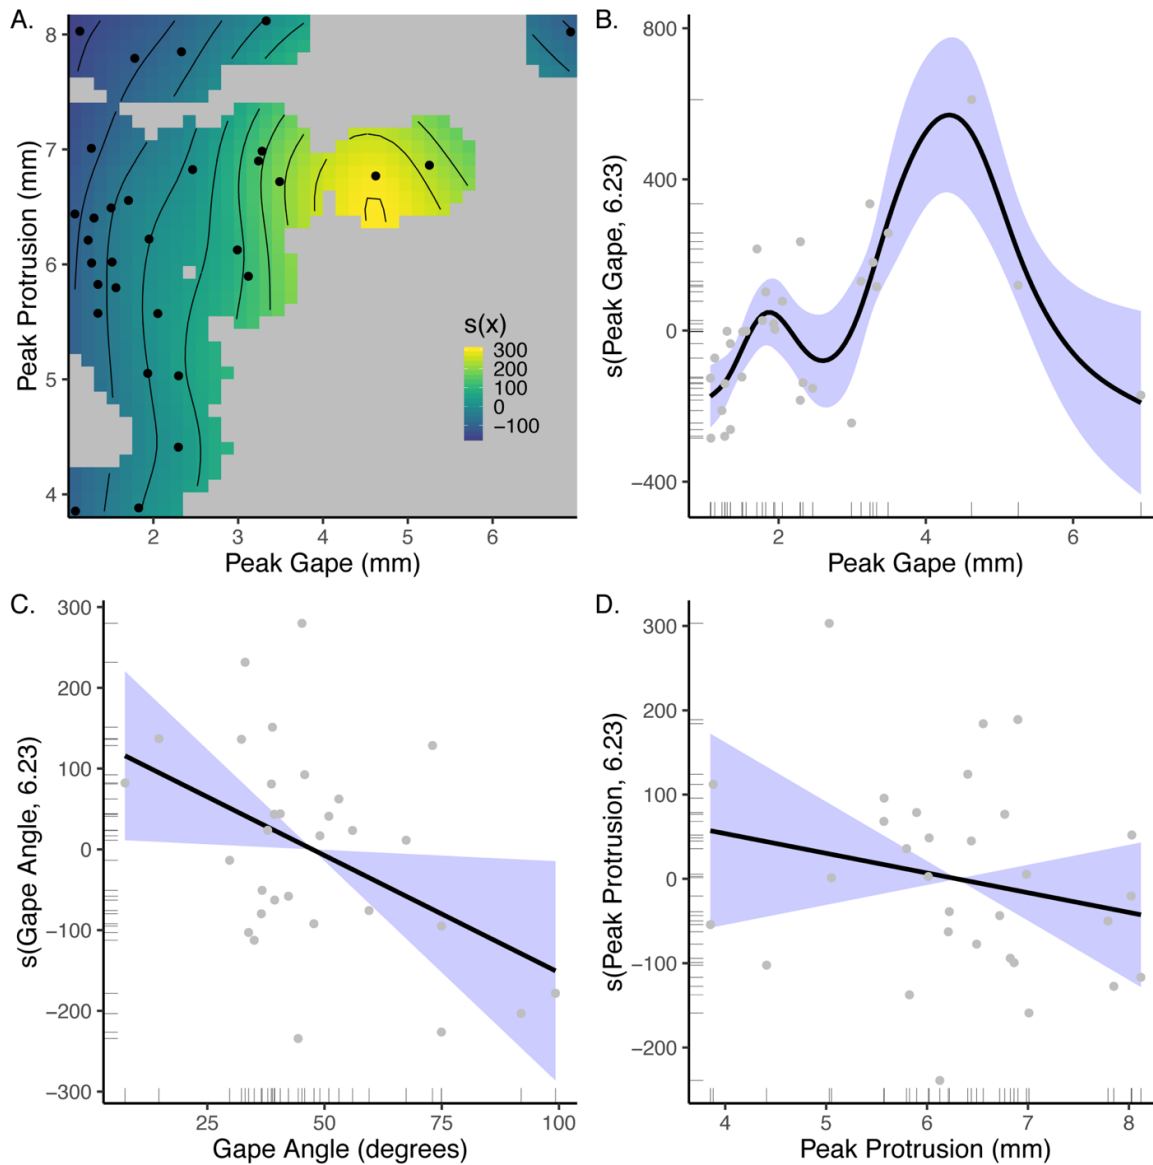

444

445 **Figure 5. The interaction of peak gape and peak protrusion may result in a**  
446 **performance optimum for scale-biting.** a) Visualization of a GAM model investigating  
447 how the thin-plate interaction between peak gape (mm) and peak protrusion (mm)  
448 affects bite size (area removed per strike from a gelatin cube). Yellow colors represent  
449 larger bites, while blues represent smaller bites. Grey areas represent bite sizes that  
450 cannot be predicted from the current data set. b) Visualizations of the smoothing splines  
451 for b) peak gape size, c) gape angle, and d) peak protrusion within the GAM model.

452

453

454 **Figure 6.**

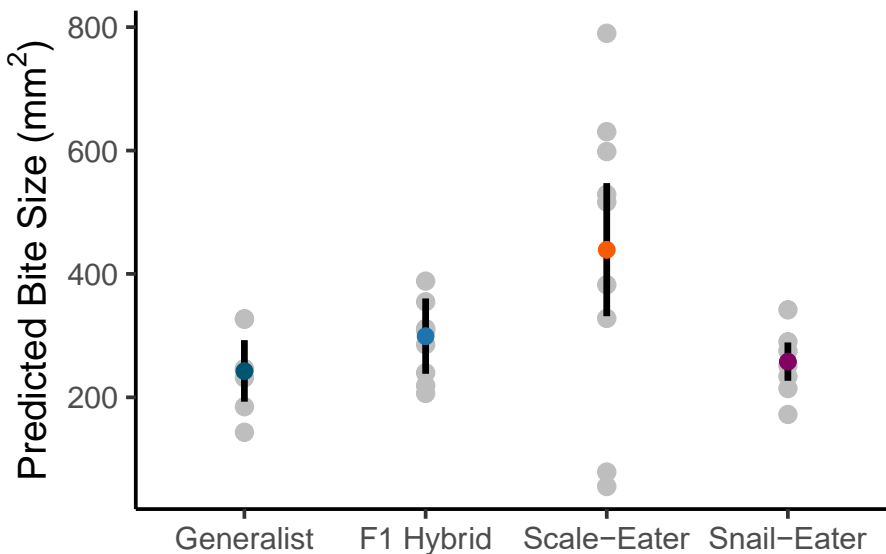

455

456 **Figure 6. Scale-eaters have larger predicted bite sizes compared to other species.**

457 Predicted bite sizes for all strikes from each species using machine-learning  
458 optimization of GAM models. Grey points represent predicted bite sizes for individuals,  
459 color points represent means, and bars represent  $\pm$  95% CIs calculated via  
460 bootstrapping (20,000 iterations).

461

462 *F1 hybrid kinematics are not additive and more closely resemble generalist kinematics*

463 F1 hybrid feeding kinematics, across both food items, differed from scale-eater kinematics

464 (TukeyHSD,  $P = 4.59 \times 10^{-8}$ ), but were not significantly different from generalist kinematics

465 (Tukey's HSD,  $P = 0.21$ ). Mean hybrid peak gape was 58% smaller than scale-eater peak gape

466 and 24% larger than generalist peak gape (Figure 2B). Similarly, mean hybrid gape angle was

467 56% larger than scale-eater peak gape angle, but was only 4.25% smaller than the mean

468 generalist gape angle (Figure 2C). Hybrids failed to match additive predictions of intermediate

469 kinematics for both peak gape (t-test,  $\mu = 3.13$ , mean = 2.25 mm,  $P = 0.0032$ ) and gape angle (t-

470 test,  $\mu = 42.43$ , mean = 48.37 degrees,  $P = 0.044$ ).

471

472 **Discussion**

473 **Scale-eating pupfish have divergent, but not plastic, feeding kinematics**

474 Scale-eating pupfish exhibited peak gapes during scale-eating strikes that were twice as large  
475 and gape angles that were 32% smaller than other sympatric species within the San Salvador  
476 Island radiation. Similarly, Janovetz (2005) found that the peak gape angle of the scale-eating  
477 piranha *Catapristion mento* was 1.5 times larger during scale-eating strikes than while suction-  
478 feeding on whole fish. Unlike *C. mento*, however, pupfish feeding kinematics remained  
479 divergent between species, but consistent across prey items (Table 3). In fact, the only kinematic  
480 variable that varied between prey items was ram speed (Table 3, Figure S2). However, this may  
481 simply be due to the fact that shrimp were a moving target during feeding trials while scales  
482 were stationary on the side of a euthanized zebrafish. Alternatively, phenotypic plasticity due to  
483 rearing environment could produce a similar pattern where wild caught pupfish display plastic  
484 kinematic traits, while lab reared pupfish do not. However, we find this scenario unlikely as all  
485 fish were acclimated to the laboratory environment for several months before feeding trials  
486 began, and we did not observe any difference in kinematic traits between these two groups.

487

488 *Is jaw morphology solely responsible for kinematic variation?*

489 The kinematic variables that varied the most between scale-eating and non-scale-eating  
490 pupfishes were peak gape and gape angle—both related to the size of the oral jaws. Previous  
491 work has documented that the oral jaws of scale-eating pupfish are three times larger than their  
492 sister species (Holtmeier 2001; Martin and Wainwright 2013a; Martin 2016) and controlled by  
493 four moderate-effect QTL with all positive effects on jaw size, consistent with directional  
494 selection on this trait (Martin et al. 2017). It may be that increased oral jaw size is sufficient to

495 create variation in feeding kinematics without an accompanying shift in behavior. Previous  
496 studies have documented how changes in morphology alone can alter feeding kinematics. For  
497 example, kinematic studies have found that the scaling of the lower jaw in bluegill (Wainwright  
498 and Shaw 1999) and body size in largemouth bass (*Micropterus salmoides*; Richard and  
499 Wainwright 1995) both significantly affected prey capture kinematics. Furthermore, Ferry-  
500 Graham et al. (2010) used the pike killifish (*Belonesox belizanus*) to show that simply doubling  
501 the length of the jaws significantly affected key kinematics variables such as peak gape size—  
502 even while keeping gape angle constant. Simply stated, the key innovation necessary for scale-  
503 eating may be an enlarged jaw. If this hypothesis were true, we would expect that peak gape  
504 would increase with jaw size, but that all other kinematics variables would remain constant  
505 across species. Our results reject this hypothesis. Instead, the gape angle of scale-eaters is 32%  
506 smaller than other groups resulting in a reduction in their potential peak gape size. This suggests  
507 that scale-eaters have evolved a smaller gape angle possibly to increase feeding performance  
508 (Figure 5 & 6). Furthermore, this reduced gape angle is consistent across food items and strikes,  
509 indicating that it is not a plastic trait relative to individual foraging context.

510

#### 511 *Scale-eating performance optimum*

512 Scale-eaters may have reduced their gape angles relative to other species in order to remain on a  
513 performance optimum for scale-eating. Our models of bite performance supported this: peak  
514 gapes larger than approximately 4.5 mm counterintuitively resulted in smaller bite sizes (Figure  
515 5A). A reduced angle in scale-eating pupfish results in a lower jaw that is essentially parallel  
516 with the ventral surface of its body—possibly resulting in greater stability for biting scales while  
517 retaining a large gape. This large gape and parallel jaw alignment may allow scale-eaters to



518 attack prey from a roughly perpendicular angle (as frequently observed during field  
519 observations) —appearing to wrap their large lower jaw under prey items and subsequently  
520 scrape scales from their sides using their independently protrusible upper jaws (also observed in  
521 a scale-eating characin: Hata et al. 2011). Interestingly, perpendicular angles of attack and large  
522 gapes are associated with scraping in benthic feeding fish (Van Wassenbergh et al. 2008; O’Neill  
523 and Gibb 2013). In fact, one prominent hypothesis for the origins of scale-eating is that it arose  
524 from an algae-scraping ancestor (Sazima et al. 1983). One caveat for this hypothesis, however, is  
525 that our current performance estimates do not include all possible combinations of peak gape and  
526 gape angle. Future work should estimate performance across all combinations of peak gape and  
527 gape angle (e.g. Stayton 2019).

528

#### 529 *Kinematics in the wild differs from the lab*

530 Scale-eating in the lab is decidedly different from in the wild. In the wild, scale-eaters must  
531 approach a prey pupfish while remaining unnoticed, attack them very quickly, hold on to the side  
532 of the pupfish as it attempts to escape, and finally rip off the desired scales and protein-rich  
533 mucus coat (Supplemental Video S1). In the lab, however, a scale-eating attack on euthanized  
534 immobilized prey involves none of these evasive prey aspects of an attack, which may affect  
535 kinematics. Despite these stark differences, many kinematic traits measured in both the lab and  
536 the wild were similar. Importantly, the two kinematics which varied the most between scale-  
537 eaters and other species in the lab, peak gape and gape angle, were consistent across  
538 environments (Table 4).

539         However, we did find that wild scale-eating strikes were faster than those in the lab and  
540 began from further away; however, the range of both these kinematics variables still overlapped

541 with strikes recorded in the lab (Table 4, Figure 3). This may indicate that pupfish can vary their  
542 feeding kinematics based on evasive prey dynamics.

543

544 **Non-additive F1 hybrid feeding kinematics may contribute to reproductive isolation of**  
545 **scale-eaters**

546 Given that complex performance traits are most likely highly polygenic and thus may exhibit  
547 additive heritability on average, we expected F1 hybrids to exhibit intermediate kinematics and  
548 performance relative to both parental species. Instead, we found that F1 hybrid kinematics did  
549 not meet the predictions of additivity and that their kinematics and performance more closely  
550 resembled that of the generalist (Table 3; Figure 2 & 6), suggesting that F1 hybrids may have  
551 higher performance in a generalist trophic niche. Current evidence from field fitness experiments  
552 supports this idea. One field experiment in these lakes measured F2 hybrid fitness in the wild and  
553 found high mortality and low growth rates for hybrids most closely resembling the scale-eating  
554 phenotype (Martin and Wainwright 2013b). Furthermore, for the few hybrids resembling scale-  
555 eaters which did survive, only 36% had recently consumed any scales compared to 92% of wild-  
556 caught scale-eaters (Martin and Wainwright 2013a,b). Impaired hybrid performance in the scale-  
557 eating niche may contribute to extrinsic postzygotic isolation between species (McGhee et al.  
558 2007; McGee et al. 2013; Higham et al. 2016). Reproductive isolation may also evolve more  
559 quickly in species that occupy a more distant fitness peak with a larger fitness valley such as the  
560 scale-eating pupfish due to stronger selection against hybrids and reinforced pre-mating isolation  
561 (Martin and Feinstein 2014). Thus impaired hybrid scale-eating performance could also  
562 contribute to increased diversification rates through the mechanism of a wider fitness valley.

563 Low hybrid performance may also be due to their morphological differences from purebred  
564 scale-eaters and generalists. As mentioned above, it is possible that a shift in morphology – such  
565 as enlarged oral jaws in scale-eaters—may be sufficient to change kinematic profiles alone. F1  
566 hybrid kinematics clearly differed from scale-eater kinematics, but their jaw lengths were also  
567 significantly smaller than the jaws of scale-eaters (Tukey’s HSD,  $P = 0.018$ ). Furthermore,  
568 previous work has shown that hybrid pupfish offspring (produced from generalist x scale-eater  
569 crosses) tend to develop along a more similar trajectory to their maternal parent (Holtmeier  
570 2001). This could indicate that hybrid pupfish with scale-eating mothers are more likely to  
571 develop jaws resembling a purebred scale-eater, but may also retain their generalist-like  
572 kinematics. The resulting mismatch between morphology, kinematic traits, and ecological niche  
573 may be driving low hybrid survival in the scale-eating niche and contributing to reproductive  
574 isolation between generalist and scale-eating pupfish species.

575

## 576 **Conclusion**

577 In conclusion, this study suggests that shifts in kinematic traits may have preceded or facilitated  
578 the origin of scale-eating in *Cyprinodon* pupfishes. Scale-eating pupfish exhibited peak gapes  
579 that were twice as large as other pupfish species, but simultaneously had gape angles that were  
580 significantly smaller. Surprisingly, we found that this unique combination of scale-eater  
581 kinematics may reside on a performance optima, as large peak gapes and small gape angles result  
582 in larger bite sizes. Impaired F1 hybrid kinematics and performance in the scale-eating niche also  
583 suggests that kinematic traits contribute to reproductive isolation of the scale-eating pupfish and  
584 the evolution of novelty. Future work should investigate if other performance optima exist on the

585 kinematic landscape and whether F2 hybrid fitness in the wild is due to a mismatch between  
586 morphology and feeding kinematics.

587

### 588 **Authors' Contributions**

589 MES and CHM conceptualized the project, MES collected data and performed all analyses, MES  
590 wrote the manuscript, MES and CHM revised drafts, and CHM funded the study.

591

### 592 **Data Accessibility**

593 All raw data will be deposited in the Dryad Digital Repository.

594

### 595 **Acknowledgements**

596 We thank the University of North Carolina at Chapel Hill, NSF CAREER 1749764, NIH  
597 5R01DE027052-02, and BSF 2016136 for funding to CHM and the UNC Quality Enhancement  
598 Plan for course-based undergraduate research (CURE) funding to CHM. The Bahamas  
599 Environmental Science and Technology Commission and the Ministry of Agriculture kindly  
600 provided permission to export fish and conduct this research. Rochelle Hanna, Velda Knowles,  
601 Thomas Rothfus, and the Gerace Research Centre provided logistical assistance in the field; Kristi  
602 Dixon, Casey Charbonneau, Gabriel Harris, Amelia Ward, Delaney O'Connell, and the  
603 undergraduate students of BIO221L 'Evolution of Extraordinary Adaptations' assisted with high-  
604 speed videography and kinematic analysis; and Roi Holzman provided helpful feedback on the  
605 research. All animal care protocols were approved by the University of California, Berkeley and  
606 the University of North Carolina at Chapel Hill Animal Care and Use Committees.

607

608 **References**

- 609 Arias-Rodriguez, L., M. Tobler, M. Palacios, F. J. García de León, D. Bierbach, M. Mateos, I.  
610 Mitrofanov, M. Plath, and L. J. Chapman. 2011. Evolution in extreme environments:  
611 replicated phenotypic differentiation in livebearing fish inhabiting sulfidic springs.  
612 *Evolution* (N. Y). 65:2213–2228.
- 613 Bates, D., M. Mächler, B. Bolker, and S. Walker. 2014. Fitting Linear Mixed-Effects Models  
614 using lme4. *J. Stat. Softw.* 67:1–48.
- 615 Bowman, R. I., and S. L. Billeb. 1965. Blood-eating in a Galápagos finch. *Living Bird* 4:29–44.
- 616 Cullen, J. A., T. Maie, H. L. Schoenfuss, and R. W. Blob. 2013. Evolutionary Novelty versus  
617 Exaptation: Oral Kinematics in Feeding versus Climbing in the Waterfall-Climbing  
618 Hawaiian Goby *Sicyopterus stimpsoni*. *PLoS One* 8:e53274. Public Library of Science.
- 619 Curry, R. L., and D. J. Anderson. 2012. Interisland Variation in Blood Drinking by Galápagos  
620 Mockingbirds. *Auk* 104:517–521.
- 621 Davis, A. L., M. H. Babb, M. C. Lowe, A. T. Yeh, B. T. Lee, and C. H. Martin. 2018. Testing  
622 Darwin’s Hypothesis about the Wonderful Venus Flytrap: Marginal Spikes Form a “Horrid  
623 Prison” for Moderate-Sized Insect Prey. *Am. Nat.* 193:309–317.
- 624 Ferry-Graham, L. A. 2002. Using Functional Morphology to Examine the Ecology and Evolution  
625 of Specialization. *Integr. Comp. Biol.* 42:265–277.
- 626 Ferry-Graham, L. A., L. P. Hernandez, A. C. Gibb, and C. Pace. 2010. Unusual kinematics and  
627 jaw morphology associated with piscivory in the poeciliid, *Belonesox belizanus*. *Zoology*  
628 113:140–147.
- 629 Ferry-Graham, L. A., P. C. Wainwright, C. Darrin Hulsey, and D. R. Bellwood. 2001. Evolution  
630 and mechanics of long jaws in butterflyfishes (Family Chaetodontidae). *J. Morphol.*

- 631 248:120–143.
- 632 Hata, H., M. Yasugi, and M. Hori. 2011. Jaw laterality and related handedness in the hunting  
633 behavior of a scale-eating characin, *Exodon paradoxus*. PLoS One 6.
- 634 Hatfield, T., and D. Schluter. 1999. Ecological Speciation in Sticklebacks: Environment-  
635 Dependent Hybrid Fitness. *Evolution* (N. Y). 53:866. Mayr.
- 636 Henning, F., G. Machado-Schiaffino, L. Baumgarten, and A. Meyer. 2017. Genetic dissection of  
637 adaptive form and function in rapidly speciating cichlid fishes. *Evolution* (N. Y). 71:1297–  
638 1312.
- 639 Higham, T. E., S. M. Rogers, R. B. Langerhans, H. A. Jamniczky, G. V. Lauder, W. J. Stewart,  
640 C. H. Martin, and D. N. Reznick. 2016. Speciation through the lens of biomechanics:  
641 locomotion, prey capture and reproductive isolation. *Proc. R. Soc. B Biol. Sci.*  
642 283:20161294.
- 643 Holtmeier, C. L. 2001. Heterochrony, maternal effects, and phenotypic variation among  
644 sympatric pupfishes. *Evolution* 55:330–8.
- 645 Holzman, R., D. C. Collar, R. S. Mehta, and P. C. Wainwright. 2012. An integrative modeling  
646 approach to elucidate suction-feeding performance. *J. Exp. Biol.* 215:1–13. The Company  
647 of Biologists Ltd.
- 648 Hu, Y., N. Nelson-Maney, and P. S. L. Anderson. 2017. Common evolutionary trends underlie  
649 the four-bar linkage systems of sunfish and mantis shrimp. *Evolution* (N. Y). 71:1397–  
650 1405.
- 651 Janovetz, J. 2005. Functional morphology of feeding in the scale-eating specialist *Catoprion*  
652 *mento*. *J. Exp. Biol.* 208:4757–68.
- 653 Keren, T., M. Kiflawi, C. Martin, V. China, O. Mann, and R. Holzman. 2018. A complex

654 performance landscape for suction-feeding reveals constraints and adaptations in a  
655 population of reef damselfish. bioRxiv 239418.

656 Kuhn, M. 2008. Building predictive models in R using the caret package. *J. Stat. Softw.* 1–26.

657 Larabee, F. J., and A. V. Suarez. 2014. the Evolution and Functional Morphology of Trap-Jaw  
658 Ants. *Myrmecological News* 25–36.

659 Lencer, E. S., W. C. Warren, R. Harrison, and A. R. McCune. 2017. The *Cyprinodon variegatus*  
660 genome reveals gene expression changes underlying differences in skull morphology among  
661 closely related species. *BMC Genomics* 18:424.

662 Longo, S. J., T. Goodearly, and P. C. Wainwright. 2018. Extremely fast feeding strikes are  
663 powered by elastic recoil in a seahorse relative, the snipefish, *Macroramphosus scolopax*. P.  
664 20181078 in *Proceedings of the Royal Society B: Biological Sciences*. The Royal Society.

665 Martin, C. H. 2016. The cryptic origins of evolutionary novelty: 1000-fold faster trophic  
666 diversification rates without increased ecological opportunity or hybrid swarm. *Evolution*  
667 (N. Y). 70:2504–2519.

668 Martin, C. H., and L. C. Feinstein. 2014. Novel trophic niches drive variable progress towards  
669 ecological speciation within an adaptive radiation of pupfishes. *Mol. Ecol.* 23:1846–1862.

670 Martin, C. H., and P. C. Wainwright. 2013a. A Remarkable Species Flock of *Cyprinodon*  
671 Puffishes Endemic to San Salvador Island, Bahamas. *Bull. Peabody Museum Nat. Hist.*  
672 54:231–241.

673 Martin, C. H., and P. C. Wainwright. 2013b. Multiple fitness peaks on the adaptive landscape  
674 drive adaptive radiation in the wild. *Science* 339:208–11.

675 Matthews, D. G., and R. C. Albertson. 2017. Effect of craniofacial genotype on the relationship  
676 between morphology and feeding performance in cichlid fishes. *Evolution (N. Y).* 71:2050–

- 677           2061.
- 678   McGee, M. D., D. Schluter, and P. C. Wainwright. 2013. Functional basis of ecological  
679           divergence in sympatric stickleback. *BMC Evol. Biol.* 13:277. BioMed Central.
- 680   McGhee, K. E., R. C. Fuller, and J. Travis. 2007. Male competition and female choice interact to  
681           determine mating success in the bluefin killifish. *Behav. Ecol.* 18:822–830.
- 682   O’Neill, M. W., and A. C. Gibb. 2013. Does Feeding Behavior Facilitate Trophic Niche  
683           Partitioning in Two Sympatric Sucker Species from the American Southwest? *Physiol.*  
684           *Biochem. Zool.* 87:65–76.
- 685   Patek, S. N., J. E. Baio, B. L. Fisher, and A. V Suarez. 2006. Multifunctionality and mechanical  
686           origins: Ballistic jaw propulsion in trap-jaw ants.
- 687   R Core Team. 2018. R: A Language and Environment for Statistical Computing. R Found. Stat.  
688           Comput. Vienna, Austria. URL <https://www.R-project.org/>. 0:{ISBN} 3-900051-07-0.
- 689   Richards, E., and C. Martin. 2017. Adaptive introgression from distant Caribbean islands  
690           contributed to the diversification of a microendemic radiation of trophic specialist  
691           pupfishes. *PLOS Genet.*, doi: 10.1101/115055.
- 692   Sazima, I., D. De Zoologia, U. E. De Campinas, and S. Paulo. 1983. Scale-eating in characoids  
693           and other fishes. 9.
- 694   Shapiro, L. J., J. W. Young, and A. Souther. 2011. Quadrupedal Locomotion of Saimiri  
695           boliviensis: A Comparison of Field and Laboratory-based Kinematic Data. Pp. 335–356 *in*  
696           *Primate Locomotion*. Springer New York, New York, NY.
- 697   Stayton, C. T. 2019. Performance in three shell functions predicts the phenotypic distribution of  
698           hard-shelled turtles. *Evolution (N. Y.)*. 73:720–734. John Wiley & Sons, Ltd (10.1111).
- 699   Stevens, N. J., J. H. Ratsimbazafy, and F. Ralainasolo. 2011. Linking Field and Laboratory



- 700 Approaches for Studying Primate Locomotor Responses to Support Orientation. Pp. 311–  
701 333 *in* Primate Locomotion. Progress and Prospects.
- 702 Svanbäck, R., P. C. Wainwright, and L. A. Ferry-Graham. 2002. Linking Cranial Kinematics,  
703 Buccal Pressure, and Suction Feeding Performance in Largemouth Bass. *Physiol. Biochem.*  
704 *Zool.* 75:532–543.
- 705 Takeuchi, Y., M. Hori, and Y. Oda. 2012. Lateralized kinematics of predation behavior in a Lake  
706 Tanganyika scale-eating cichlid fish. *PLoS One* 7:e29272. Public Library of Science.
- 707 Tebbich, S., K. Sterelny, and I. Teschke. 2010. The tale of the finch: adaptive radiation and  
708 behavioural flexibility. *Philos. Trans. R. Soc. Lond. B. Biol. Sci.* 365:1099–109. The Royal  
709 Society.
- 710 Tobler, M., J. L. Kelley, M. Plath, and R. Riesch. 2018. Extreme environments and the origins of  
711 biodiversity: Adaptation and speciation in sulphide spring fishes.
- 712 Tobler, M., R. Riesch, and M. Plath. 2015. Extremophile fishes: An integrative synthesis. Pp.  
713 279–296 *in* Extremophile Fishes: Ecology, Evolution, and Physiology of Teleosts in  
714 Extreme Environments.
- 715 Van Wassenbergh, S., T. Lieben, A. Herrel, F. Huysentruyt, T. Geerinckx, D. Adriaens, and P.  
716 Aerts. 2008. Kinematics of benthic suction feeding in Callichthyidae and Mochokidae, with  
717 functional implications for the evolution of food scraping in catfishes. *J. Exp. Biol.*  
718 212:116–125.
- 719 Whitford, M. D., R. W. Clark, G. A. Freymiller, and T. E. Higham. 2019. Determinants of  
720 predation success : How to survive an attack from a rattlesnake. *Funct. Ecol.* 1–11. John  
721 Wiley & Sons, Ltd (10.1111).
- 722 Wood, S. N. 2011. Fast stable restricted maximum likelihood and marginal likelihood estimation

723 of semiparametric generalized linear models. *J. R. Stat. Soc. Ser. B Stat. Methodol.* 73:3–

724 36.

725

726

727

728

729

730

731

732

733

734

735

736

737

738

739

740

741

742

743

744

745 **Table 1.** Description of the 8 kinematic metrics and 3 morphological metrics measured from  
746 high-speed videos of feeding strikes.

747

| Metric                           | Measurement                                                                                                                                                            |
|----------------------------------|------------------------------------------------------------------------------------------------------------------------------------------------------------------------|
| Peak Protrusion (mm)             | The distance (mm) from the center of the eye to the anterior tip of the premaxilla.                                                                                    |
| Time to Peak Protrusion (s)      | Time (s) from the start of an attack (20% of peak gape) to peak protrusion.                                                                                            |
| Peak Gape                        | The distance (mm) from the anterior tip of the premaxilla to the anterior tip of the dentary.                                                                          |
| Time to Peak Gape (s)            | Time (s) from the start of an attack to peak gape.                                                                                                                     |
| Gape Angle (degrees)             | 180° minus the angle produced at peak gape between the lower jaw, the quadrate-articular joint, and the ventral surface of the fish beneath the suspensorium (Fig. 2). |
| Time to Impact (seconds)         | Time (s) from the start of an attack to first contact of oral jaws with the prey item.                                                                                 |
| Starting Distance from prey (mm) | The distance (mm) from the center of the orbit at the start of an attack to the center of the orbit at impact with prey item.                                          |
| Ram speed (m/s)                  | Starting distance from prey (m) / time to impact (s)                                                                                                                   |
| Body length (mm)                 | The length (mm) from the anterior tip of the dentary with mouth closed to the posterior end of the hypural plate at the midpoint insertion of the caudal fin.          |
| Lower jaw length (mm)            | The length (mm) from the anterior tip of the dentary to the quadrate-articular joint (jaw joint).                                                                      |

748

749

750

751

752

753

754

755

756 **Table 2.** Results of a linear discriminant analysis for kinematic variables between strikes on  
757 shrimp and scales.

| <b>Kinematic Metrics</b>         | <b>LD1</b> | <b>LD2</b> | <b>LD3</b> |
|----------------------------------|------------|------------|------------|
| Peak Protrusion (mm)             | 0.23       | -0.44      | 0.14       |
| Peak Gape (mm)                   | 1.33       | 0.47       | -0.83      |
| Gape Angle (degrees)             | 0.08       | 0.00       | 0.02       |
| Time to Peak Protrusion (s)      | 37.30      | -12.88     | 9.90       |
| Time to Peak Gape (s)            | -5.10      | -14.42     | 49.24      |
| Time to Impact (s)               | 9.85       | 35.43      | 0.18       |
| Starting Distance from prey (mm) | -614.27    | 28.85      | -545.38    |
| Ram speed (m/s)                  | 25.12      | 14.23      | 45.50      |
| Proportion of Trace              | 0.94       | 0.05       | 0.02       |
| <b>Kinematic Metrics</b>         | <b>LD1</b> | <b>LD2</b> | <b>LD3</b> |
| Peak Protrusion (mm)             | 0.23       | -0.44      | 0.14       |
| Peak Gape (mm)                   | 1.33       | 0.47       | -0.83      |
| Gape Angle (degrees)             | 0.08       | 0.00       | 0.02       |
| Time to Peak Protrusion (s)      | 37.30      | -12.88     | 9.90       |
| Time to Peak Gape (s)            | -5.10      | -14.42     | 49.24      |
| Time to Impact (s)               | 9.85       | 35.43      | 0.18       |
| Starting Distance from prey (mm) | -614.27    | 28.85      | -545.38    |
| Ram speed (m/s)                  | 25.12      | 14.23      | 45.50      |
| Proportion of Trace              | 0.94       | 0.05       | 0.02       |

758

759

760

761

762

763

764

765 **Table 3.** Results of linear mixed models investigating if strike kinematic variables vary between  
 766 1) species (generalists, snail-eaters, scale-eaters, or hybrids), 2) food item (shrimp or scales), or  
 767 3) the interaction between the two. Significant predictors are indicted in bold.

| <b>Response</b>                     | <b>Predictors</b> | $\chi^2$  | <i>df</i> | <i>P</i>                   |
|-------------------------------------|-------------------|-----------|-----------|----------------------------|
| Peak Protrusion (mm)                | Species           | 4.5       | 3         | 0.21                       |
|                                     | Food Item         | 1.2       | 1         | 0.27                       |
|                                     | log(Body Length)  | 3         | 1         | 0.085                      |
|                                     | Species:Food Item | 2.3       | 3         | 0.51                       |
| Peak Gape (mm)                      | <b>Species</b>    | <b>23</b> | <b>3</b>  | <b>3.4x10<sup>-5</sup></b> |
|                                     | Food Item         | 1.1       | 1         | 0.3                        |
|                                     | log(Body Length)  | 1.3       | 1         | 0.26                       |
|                                     | Species:Food Item | 0.83      | 3         | 0.84                       |
| Peak gape angle<br>(degrees)        | <b>Species</b>    | <b>18</b> | <b>3</b>  | <b>0.00037</b>             |
|                                     | Food Item         | 0.016     | 1         | 0.9                        |
|                                     | log(Body Length)  | 3.4       | 1         | 0.066                      |
|                                     | Species:Food Item | 3.6       | 3         | 0.3                        |
| Time to Peak Protrusion<br>(s)      | Species           | 4.1       | 3         | 0.25                       |
|                                     | Food Item         | 1.1       | 1         | 0.3                        |
|                                     | log(Body Length)  | 1.2       | 1         | 0.27                       |
|                                     | Species:Food Item | 3.3       | 3         | 0.34                       |
| Time to Peak Gape (s)               | Species           | 2.5       | 3         | 0.48                       |
|                                     | Food Item         | 0.87      | 1         | 0.35                       |
|                                     | log(Body Length)  | 2         | 1         | 0.16                       |
|                                     | Species:Food Item | 1.6       | 3         | 0.65                       |
| Time to Impact (s)                  | Species           | 3.4       | 3         | 0.33                       |
|                                     | Food Item         | 2.1       | 1         | 0.14                       |
|                                     | log(Body Length)  | 1.5       | 1         | 0.21                       |
|                                     | Species:Food Item | 4.5       | 3         | 0.21                       |
| Starting Distance from<br>prey (mm) | Species           | 2.8       | 3         | 0.42                       |
|                                     | Food Item         | 0.032     | 1         | 0.86                       |
|                                     | log(Body Length)  | 2.1       | 1         | 0.15                       |
|                                     | Species:Food Item | 0.35      | 3         | 0.95                       |
| Ram speed (m/s)                     | Species           | 3.7       | 3         | 0.3                        |
|                                     | <b>Food Item</b>  | <b>4</b>  | <b>1</b>  | <b>0.047</b>               |

|                   |     |   |      |
|-------------------|-----|---|------|
| log(Body Length)  | 1.2 | 1 | 0.27 |
| Species:Food Item | 2.2 | 3 | 0.54 |

---

768

769

770

771

772

773

774

775

776

777

778

779

780

781

782

783

784

785

786

787

788

789 **Table 4.** Results of linear mixed models investigating if scale-eating kinematics vary between  
 790 lab trials and wild strikes observed in situ in Crescent Pond, San Salvador Island, Bahamas.  
 791 Significant predictors are indicted in bold.

| <b>Response</b>                  | <b>Predictors</b>  | $\chi^2$   | <i>df</i> | <i>P</i>       |
|----------------------------------|--------------------|------------|-----------|----------------|
| Peak Protrusion (mm)             | Environment        | 1.5        | 1         | 0.22           |
|                                  | log(Body Length)   | 5.9        | 1         | 0.016          |
| Peak Gape (mm)                   | Environment        | 0.0018     | 1         | 0.97           |
|                                  | log(Body Length)   | 2.6        | 1         | 0.11           |
| Gape Angle (degrees)             | Environment        | 0.0027     | 1         | 0.96           |
|                                  | log(Body Length)   | 3.1        | 1         | 0.078          |
| Time to Peak Protrusion (s)      | Environment        | 0.017      | 1         | 0.9            |
|                                  | log(Body Length)   | 1.7        | 1         | 0.19           |
| Time to Peak Gape (s)            | Environment        | 0.27       | 1         | 0.6            |
|                                  | log(Body Length)   | 3.7        | 1         | 0.053          |
| Time to Impact (s)               | Environment        | 0.98       | 1         | 0.32           |
|                                  | log(Body Length)   | 2          | 1         | 0.16           |
| Starting Distance from prey (mm) | <b>Environment</b> | <b>4.5</b> | <b>1</b>  | <b>0.033</b>   |
|                                  | log(Body Length)   | 0.9        | 1         | 0.34           |
| Ram speed (m/s)                  | <b>Environment</b> | <b>11</b>  | <b>1</b>  | <b>0.00099</b> |
|                                  | log(Body Length)   | 0.1        | 1         | 0.75           |

792

793

794

795

796

797

798

799 **Table 5.** Results of linear mixed models investigating if the area removed from a cube by a  
800 single bite was affected by any of the PCs from our PCA analysis. Significant predictors are

| <b>Response</b>                              | <b>Predictor</b> | $\chi^2$    | <b>df</b> | <b>P</b>     |
|----------------------------------------------|------------------|-------------|-----------|--------------|
| Area Removed from Cube<br>(mm <sup>2</sup> ) | PC1              | 1.60        | 1         | 0.21         |
|                                              | <b>PC2</b>       | <b>5.49</b> | <b>1</b>  | <b>0.02</b>  |
|                                              | PC3              | 0.11        | 1         | 0.74         |
|                                              | PC4              | 0.29        | 1         | 0.59         |
|                                              | <b>PC5</b>       | <b>8.80</b> | <b>1</b>  | <b>0.003</b> |
|                                              | PC6              | 0.46        | 1         | 0.50         |
|                                              | PC7              | 1.86        | 1         | 0.17         |
|                                              | PC8              | 0.00        | 1         | 1.00         |
|                                              | log(Body Length) | 2.21        | 1         | 0.14         |

801

802

803

804

805

806

807

808

809

810

811

812

813

814

815

816



817 **Supplemental Material**

818

819 **Table S1. Jaw length varies between species.** Results of linear mixed model investigating if  
820 any morphological traits varied between species. Significant predictors are indicated in bold.

821

| <b>Response</b> | <b>Predictors</b> | $\chi^2$     | <i>df</i> | <b><i>P</i></b>               |
|-----------------|-------------------|--------------|-----------|-------------------------------|
| Log Body Length | Species           | 6.36         | 3         | 0.095                         |
| Log Jaw Length  | <b>Species</b>    | <b>45.87</b> | <b>3</b>  | <b>6.039x10<sup>-10</sup></b> |

822

823 **Table S2. PCA Loadings describing kinematic variation in pupfish while feeding on shrimp**  
 824 **and scales.** Major loadings ( $|\text{loading}| > 0.4$ ) are indicated in bold.

|                                  | PC1          | PC2          | PC3           | PC4           | PC5           | PC6           | PC7           | PC8           |
|----------------------------------|--------------|--------------|---------------|---------------|---------------|---------------|---------------|---------------|
| Peak                             |              |              |               |               |               |               |               |               |
| Protrusion (mm)                  | 0.376        | 0.142        | -0.063        | <b>-0.449</b> | <b>0.786</b>  | -0.015        | 0.077         | -0.095        |
| Peak Gape (mm)                   | 0.368        | -0.036       | -0.175        | <b>-0.669</b> | <b>-0.575</b> | 0.131         | 0.188         | 0.056         |
| Gape Angle (degrees)             | 0.08         | -0.277       | <b>-0.925</b> | 0.224         | 0.069         | -0.077        | -0.015        | 0.021         |
| Time to Peak Protrusion (s)      | <b>0.419</b> | -0.188       | 0.19          | 0.192         | -0.096        | <b>-0.784</b> | 0.287         | -0.1          |
| Time to Peak Gape (s)            | <b>0.434</b> | -0.249       | 0.123         | 0.035         | -0.063        | 0.044         | <b>-0.845</b> | -0.118        |
| Time to Impact (s)               | <b>0.412</b> | -0.23        | 0.137         | 0.39          | 0.012         | 0.588         | 0.391         | -0.328        |
| Starting Distance from prey (mm) | <b>0.407</b> | 0.39         | -0.002        | 0.292         | -0.005        | 0.099         | 0.004         | <b>0.766</b>  |
| Ram speed (m/s)                  | 0.135        | <b>0.774</b> | -0.199        | 0.159         | -0.184        | -0.071        | -0.099        | <b>-0.518</b> |
| Standard Deviation               | 2.096        | 1.19         | 0.987         | 0.734         | 0.621         | 0.427         | 0.311         | 0.123         |
| Proportion $\sigma^2$            | 0.549        | 0.177        | 0.122         | 0.067         | 0.048         | 0.023         | 0.012         | 0.002         |
| Cumulative Proportion $\sigma^2$ | 0.549        | 0.726        | 0.848         | 0.915         | 0.963         | 0.986         | 0.998         | 1             |

825  
 826  
 827

828 **Table S3. PCA Loadings describing kinematic variation in pupfish while feeding on fish**  
 829 **cubes.** Major loadings for PC2 and PC5 ( $|\text{loading}| > 0.4$ ) are indicated in bold.  
 830

|                                  | PC1   | PC2          | PC3   | PC4   | PC5          | PC6   | PC7   | PC8   |
|----------------------------------|-------|--------------|-------|-------|--------------|-------|-------|-------|
| Peak                             |       |              |       |       |              |       |       |       |
| Protrusion (mm)                  | -0.04 | -0.16        | 0.72  | 0.43  | <b>-0.51</b> | 0.12  | -0.04 | 0.00  |
| Peak Gape (mm)                   | -0.30 | -0.18        | 0.55  | -0.09 | <b>0.72</b>  | -0.20 | 0.08  | 0.01  |
| Gape Angle (degrees)             | 0.00  | 0.33         | 0.36  | -0.82 | -0.28        | 0.02  | -0.08 | 0.02  |
| Time to Peak Protrusion (s)      | -0.55 | 0.06         | -0.08 | -0.03 | 0.05         | 0.80  | 0.21  | -0.05 |
| Time to Peak Gape (s)            | -0.56 | 0.08         | -0.12 | 0.08  | -0.08        | -0.19 | -0.79 | 0.00  |
| Time to Impact (s)               | -0.53 | 0.15         | -0.12 | 0.04  | -0.29        | -0.50 | 0.57  | 0.15  |
| Starting Distance from prey (mm) | -0.12 | <b>-0.62</b> | -0.10 | -0.25 | -0.18        | -0.10 | 0.05  | -0.69 |
| Ram speed (m/s)                  | -0.04 | <b>-0.64</b> | -0.10 | -0.24 | -0.12        | 0.06  | -0.05 | 0.71  |
| Standard Deviation               | 1.73  | 1.50         | 1.13  | 0.90  | 0.71         | 0.38  | 0.18  | 0.05  |
| Proportion $\sigma^2$            | 0.37  | 0.28         | 0.16  | 0.10  | 0.06         | 0.02  | 0.00  | 0.00  |
| Cumulative Proportion $\sigma^2$ | 0.37  | 0.65         | 0.81  | 0.91  | 0.98         | 1.00  | 1.00  | 1.00  |

831

832  
833  
834  
835

**Figure S1.** Visualization of PC1 and PC2 describing kinematic variation in pupfish while feeding on shrimp and scales. Dots represent individuals, dotted lines represent 95% confidence intervals around species.

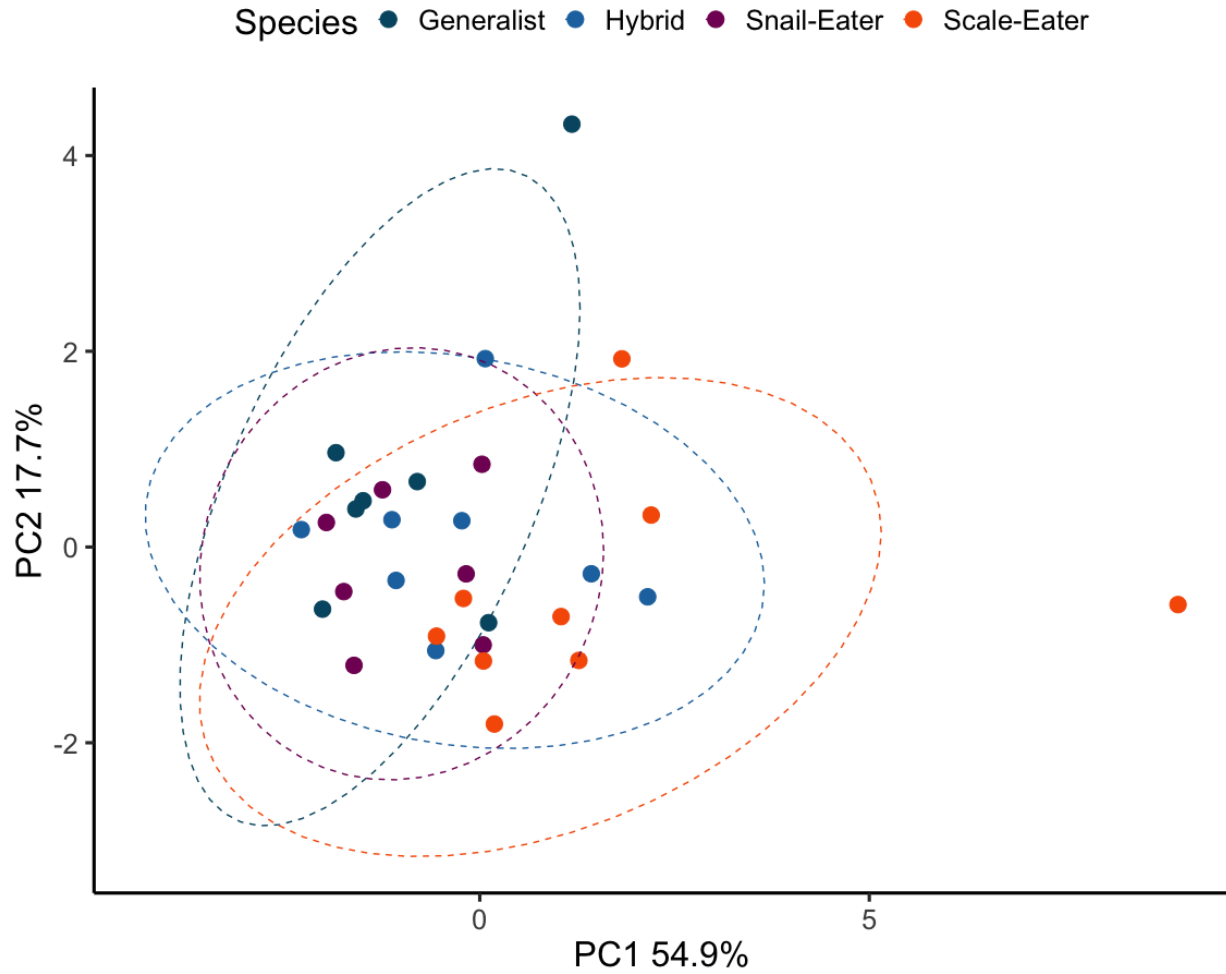

836  
837  
838

839 **Figure S2. Pupfishes approach shrimp more quickly than they do scales.** Colored points  
840 represent mean ram speed (m/s) and 95% confidence intervals when consuming shrimp versus  
841 scales for all species.  
842

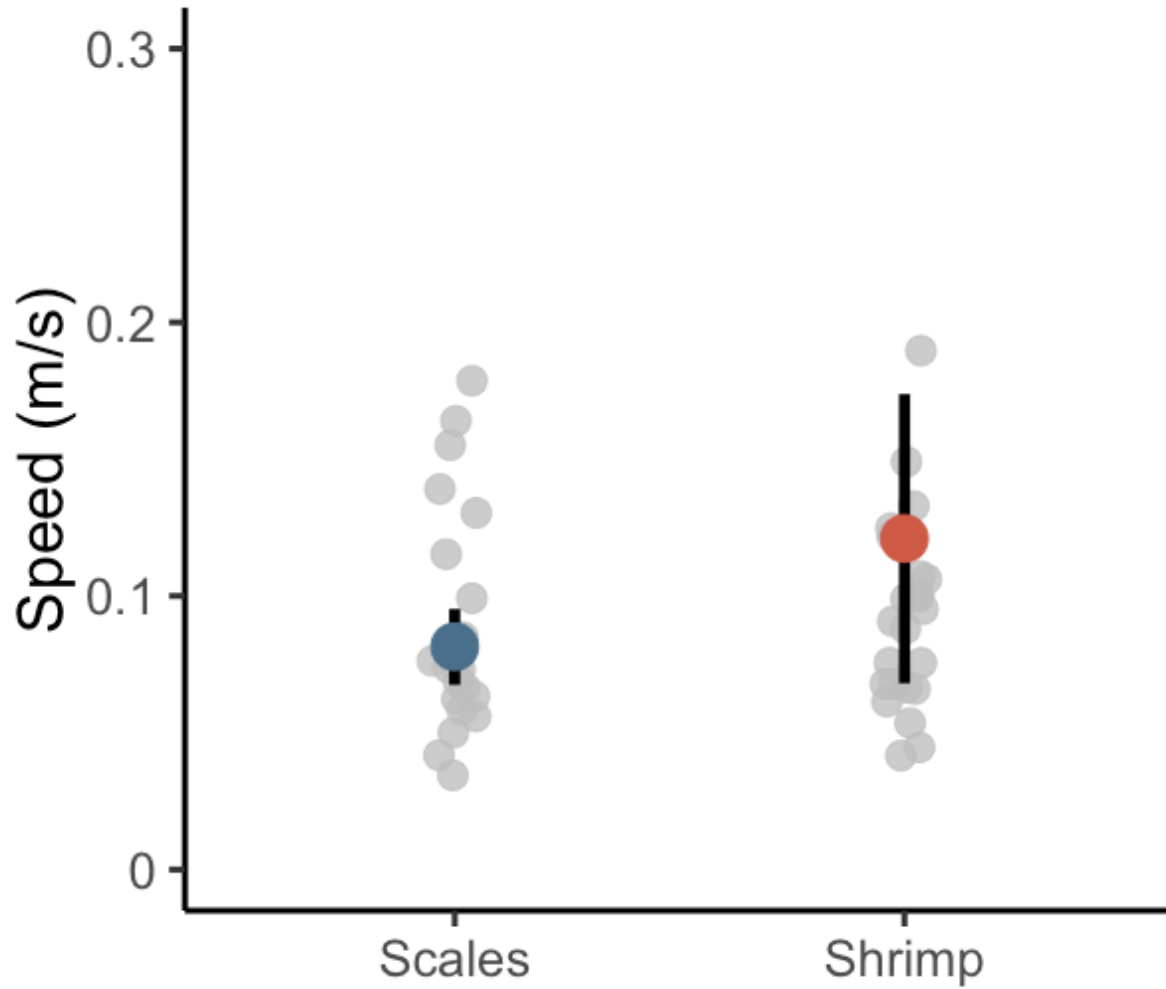

843

844 **Figure S3. Ram speed and starting distance from prey affects bite size.** Graph illustrating the  
845 negative relationship between PC2 and the area removed from a fish cube ( $\text{mm}^2$ ) from a single  
846 bite. The major loadings of PC2 are ram speed and starting distance from a prey item. Grey dots  
847 represent individual fish, the line represents the fitted prediction of a linear model along with a  
848 standard error ribbon in blue.

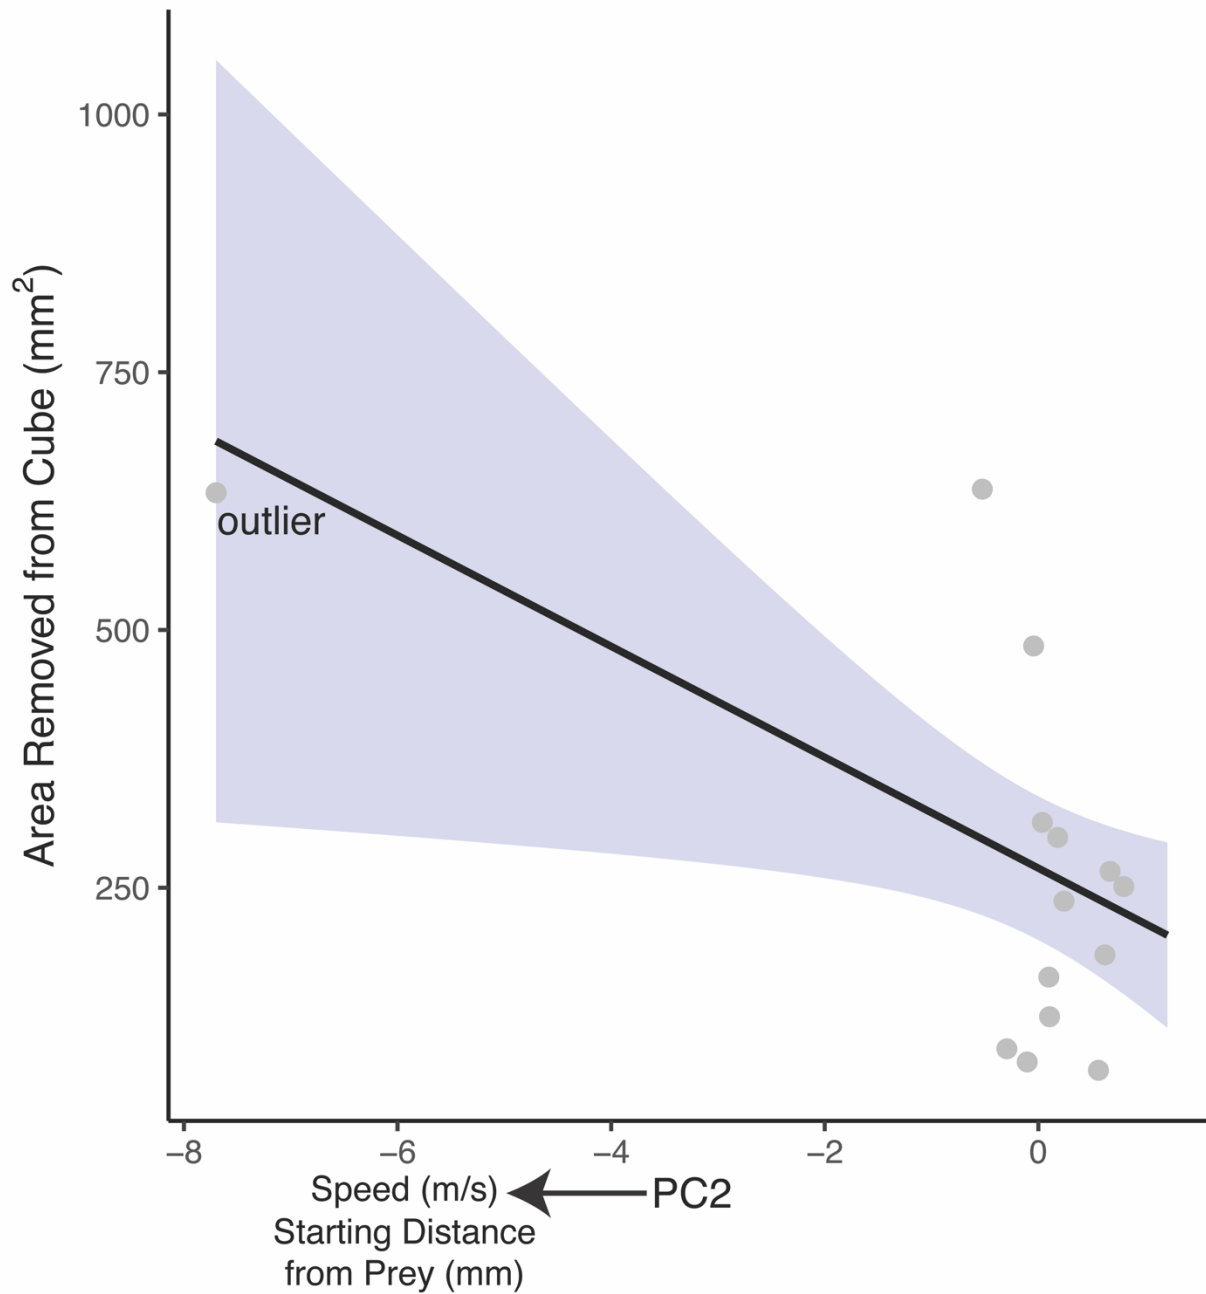

849  
850  
851

852 **Supplemental Video 1**  
853 **Scale-eating pupfish attacks a generalist pupfish in the wild.**  
854  
855  
856

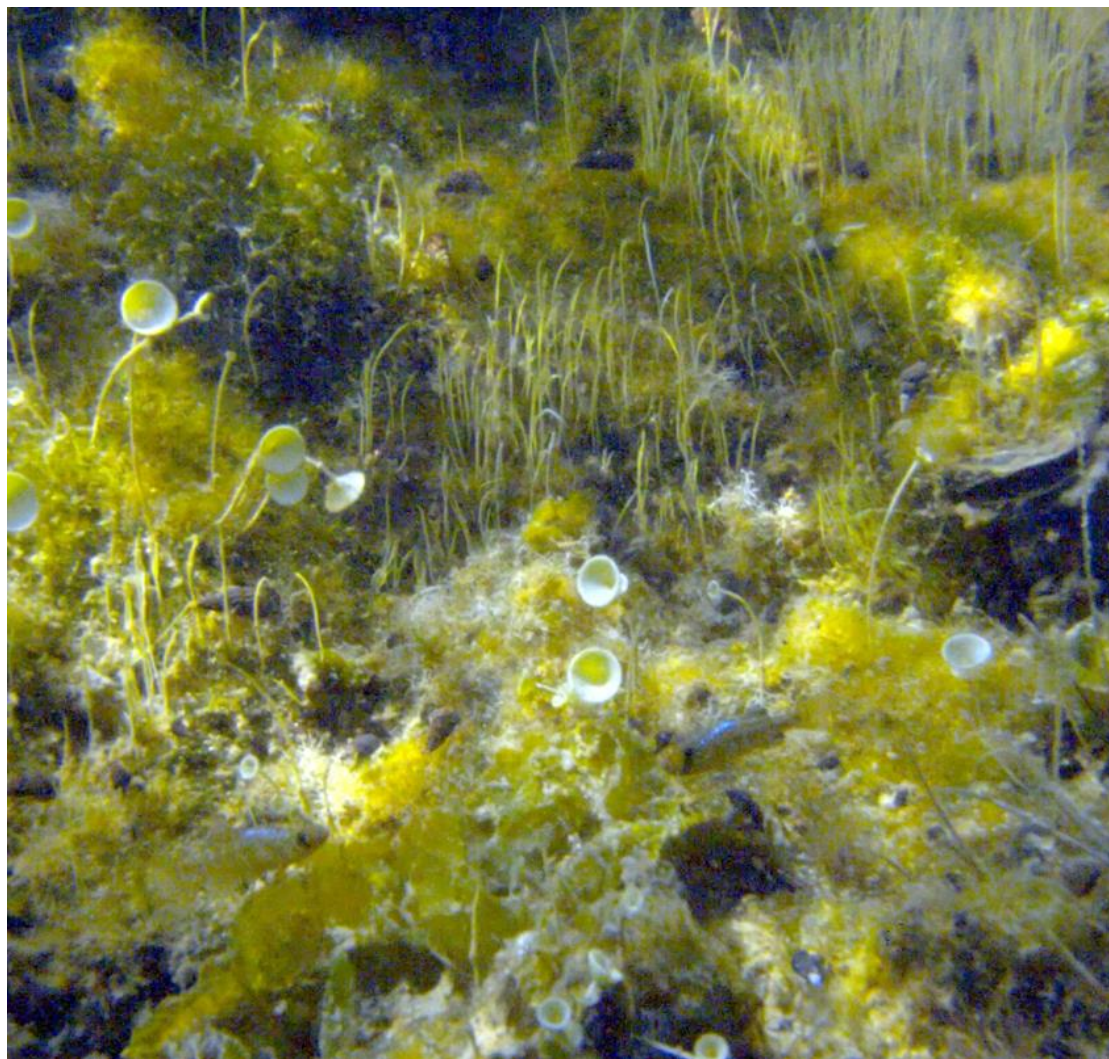

Source: https://www.biorxiv.org/content/biorxiv/early/2019/05/24/648451.full.pdf
